# Supplementary material for: Anti-Oxidative and Immune Regulatory Responses of THP-1 and PBMC to Pulsed EMF Are Field-Strength Dependent
Source: MDPI journal article supplement (doi:10.3390/ijerph18189519), 2021-09-09
Supplement: s1 [file s1]

## Supplemental Information

### Anti-oxidative and immune regulatory responses of THP1 and PBMC to pulsed EMF are field-strength dependent

Silvia Groiss <sup>1</sup>, Roland Lammegger <sup>2</sup> and Dagmar Brislinger <sup>1,\*</sup>

<sup>1</sup> Division of Cell Biology, Histology and Embryology, Gottfried Schatz Research Center, Medical University of Graz, 8010 Graz, Austria; silvia.groiss@medunigraz.at (S.G.),

<sup>2</sup> Institute of Experimental Physics, Graz University of Technology, 8010 Graz, Austria; roland.lammegger@tugraz.at

\* Correspondence: dagmar.brislinger@medunigraz.at (D.B.)

Primer sequences used for RT-PCR are given in Table S1.

**Table S1.** Primer used for RT-PCR.

| Target <sup>1</sup>       | Forward primer (5' – 3') | Reverse primer (5' – 3') |
|---------------------------|--------------------------|--------------------------|
| <i>Prime targets</i>      |                          |                          |
| <i>APOE</i>               | GTTGCTGGTCACATTCCTGG     | GCAGGTAATCCCAAAGCGAC     |
| <i>PRDX6</i>              | GTGACAGCTCGTGTGGTGTT     | CTGGGGTGGCAACCTTTT       |
| <i>DHCR24</i>             | CACTGTCTCACTACGTGTCGG    | CCAGCCAATGGAGGTCAGC      |
| <i>BIRC5</i>              | AGGACCACCGCATCTCTACAT    | AAGTCTGGCTCGTTCTCAGTG    |
| <i>IL18</i>               | TCTTCATTGACCAAGGAAATCGG  | TCCGGGGTGCATTATCTCTAC    |
| <i>EGR1</i>               | GGTCAGTGGCCTAGTGAGC      | GTGCCGCTGAGTAAATGGGA     |
| <i>Additional targets</i> |                          |                          |
| <i>SOD1</i>               | GGTGGGCCAAAGGATGAAGAG    | CCACAAGCCAAACGACTTCC     |
| <i>SOD2</i>               | GGAAGCCATCAAACGTGACTT    | CCCGTTCCTTATTGAAACCAAGC  |
| <i>GPX1</i>               | TGGGCATCAGGAGAACGCCA     | GGGGTCGGTCATAAGCGCG      |
| <i>CAT</i>                | TGGAGCTGGTAACCCAGTAGG    | CCTTTGCCTTGGAGTATTTGGTA  |
| <i>HSP70</i>              | GCCGAGAAGGACGAGTTTGA     | TCCGCTGATGATGGGGTTAC     |
| <i>Casp3</i>              | CATGGAAGCGAATCAATGGACT   | CTGTACCAGACCGAGATGTCA    |
| <i>IL1B</i>               | TGAGCTCGCCAGTGAAATGAT    | TCCATGGCCACAACAACCTGA    |
| <i>IL8</i>                | GAATGGGTTTGTAGAAATGTGATA | CAGACTAGGGTTGCCAGATTTAAC |
| <i>IL10</i>               | AATAAGGTTTCTCAAGGGGCT    | AGAACCAAGACCCAGACATCAA   |

<sup>1</sup> All primer were purchased from Microsynth (Balgach, Switzerland).

Data obtained from PrimePCRs on deregulation of anti-oxidative and immune regulatory enzymes/targets is given in Table S 1 and S 2, respectively.

**Table S2.** Anti-oxidative PrimePCR targets with more than 4-fold deregulation in THP1 and PBMC.

| <b>Target</b> | <b>THP1 (fold change)</b> | <b>PBMC (fold change)</b> |
|---------------|---------------------------|---------------------------|
| <i>APOE</i>   | 133.28                    | 8.99                      |
| <i>DHCR24</i> | 13.31                     | 8.69                      |
| <i>CYBB</i>   | 10.68                     |                           |
| <i>LPO</i>    | 7.99                      |                           |
| <i>NCF1</i>   | 7.69                      | 7.96                      |
| <i>GPX5</i>   | 7.25                      |                           |
| <i>GCLM</i>   | 6.70                      |                           |
| <i>PTGS2</i>  | 6.49                      |                           |
| <i>GPX1</i>   | 6.37                      | 5.52                      |
| <i>GPX7</i>   | 6.02                      |                           |
| <i>PRDX6</i>  | 5.55                      | 973.99                    |
| <i>FOXO1</i>  | 4.98                      |                           |
| <i>GSS</i>    | 4.40                      | 47.13                     |
| <i>GPX3</i>   | -5.80                     |                           |
| <i>RNF7</i>   |                           | 132.28                    |
| <i>OXR1</i>   |                           | 62.75                     |
| <i>SQSTM1</i> |                           | 19.86                     |
| <i>CYGB</i>   |                           | 15.7                      |
| <i>MBL2</i>   |                           | 11.13                     |
| <i>NOX5</i>   |                           | 10.53                     |
| <i>HMOX1</i>  |                           | 9.96                      |
| <i>OXSR1</i>  |                           | 6.09                      |

**Table S3.** Immune regulatory PrimePCR targets with more than 4-fold deregulation in THP1 and PBMC.

| <b>Target</b>   | <b>THP1 (fold change)</b> | <b>PBMC (fold change)</b> |
|-----------------|---------------------------|---------------------------|
| <i>BIRC5</i>    | 23.48                     | 7.64                      |
| <i>EGR1</i>     | 7.97                      |                           |
| <i>CRP</i>      | 6.98                      |                           |
| <i>PTGS2</i>    | 6.52                      |                           |
| <i>COL1A1</i>   | 5.20                      |                           |
| <i>CTGF</i>     | 4.56                      |                           |
| <i>NDFIP2</i>   | 4.47                      |                           |
| <i>KRAS</i>     | 4.28                      |                           |
| <i>MMP9</i>     | -4.62                     |                           |
| <i>VCAM1</i>    | -4.98                     |                           |
| <i>CCL2</i>     | -5.19                     |                           |
| <i>CXCL12</i>   | -21.99                    |                           |
| <i>IL18</i>     |                           | 162.74                    |
| <i>HLA-DRB1</i> |                           | 15.53                     |
| <i>IL10</i>     |                           | 15.53                     |
| <i>MAPK3</i>    |                           | 10.98                     |
| <i>NFKBIA</i>   |                           | 8.75                      |
| <i>IL4</i>      |                           | 7.69                      |
| <i>TLR4</i>     |                           | 7.03                      |
| <i>UBB</i>      |                           | 4.83                      |
| <i>RELA</i>     |                           | 4.18                      |
| <i>COL1A1</i>   |                           | 4.09                      |

## Supplemental Figures

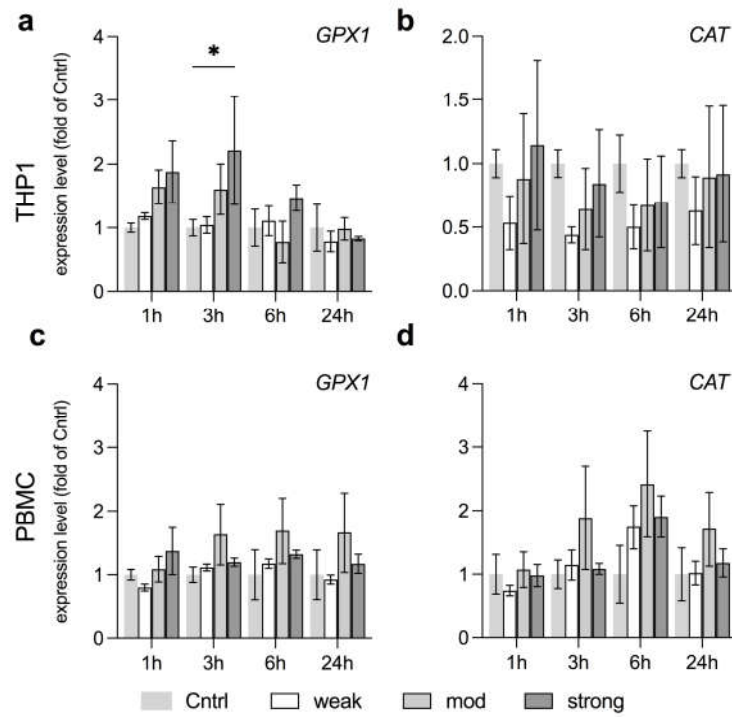

**Figure S1:** Expression levels of *GPX1* and *CAT* in THP1 (a, b) and PBMC (c, d) at different field strengths. *GPX1* levels increased in THP1 after 3 h of exposure to stEMF. No difference was found for *GPX1* in PBMC or *CAT* levels in both cell types. Data are given as fold of Cntrl (mean  $\pm$  SEM, N = 3, n = 2). \*  $p < 0.05$  as indicated.
